# Global Burden of Double Malnutrition: Has Anyone Seen It?

Daniel J. Corsi<sup>1</sup>, Jocelyn E. Finlay<sup>2</sup>, S. V. Subramanian<sup>3\*</sup>

**1** Population Health Research Institute, McMaster University and Hamilton Health Sciences, Hamilton, Canada, **2** Department of Global Health and Population, Harvard School of Public Health, Boston, Massachusetts, United States of America, **3** Department of Society, Human Development and Health, Harvard School of Public Health, Boston, Massachusetts, United States of America

## Abstract

**Background:** Low- to middle-income countries (LMICs) are believed to be characterized by the coexistence of underweight and overweight. It has also been posited that such coexistence is appearing among the low socioeconomic status (SES) groups.

**Methods:** We conducted a cross-sectional analysis of nationally representative samples of 451321 women aged 20–49 years drawn from 57 Demographic and Health Surveys conducted between 1994 and 2008. Body Mass Index (BMI in kg/m<sup>2</sup>), was used to define underweight and overweight following conventional cut-points. Covariates included age, household wealth, education, and residence. We estimated multinomial multilevel models to assess the extent to which underweight (BMI < 18.5 kg/m<sup>2</sup>) and overweight (BMI ≥ 25.0 kg/m<sup>2</sup>) correlate at the country-level, and at the neighborhood-level within each country.

**Results:** In age-adjusted models, there was a strong negative correlation between likelihood of being underweight and overweight at country- ( $r = -0.79, p < 0.001$ ), and at the neighborhood-level within countries ( $r = -0.51, P < 0.001$ ). Negative correlations ranging from  $-0.11$  to  $-0.90$  were observed in 46 of the 57 countries at the neighborhood-level and 29/57 were statistically significant ( $p \leq 0.05$ ). Similar negative correlations were observed in analyses restricted to low SES groups. Finally, the negative correlations across countries, and within-countries, appeared to be stable over time in a sub-set of 36 countries.

**Conclusion:** The explicitly negative correlations between prevalence of underweight and overweight at the country-level and at neighborhood-level suggest that the hypothesized coexistence of underweight and overweight has not yet occurred in a substantial manner in a majority of LMICs.

**Citation:** Corsi DJ, Finlay JE, Subramanian SV (2011) Global Burden of Double Malnutrition: Has Anyone Seen It? PLoS ONE 6(9): e25120. doi:10.1371/journal.pone.0025120

**Editor:** Andrea S. Wiley, Indiana University, United States of America

**Received:** June 16, 2011; **Accepted:** August 25, 2011; **Published:** September 28, 2011

**Copyright:** © 2011 Corsi et al. This is an open-access article distributed under the terms of the Creative Commons Attribution License, which permits unrestricted use, distribution, and reproduction in any medium, provided the original author and source are credited.

**Funding:** These authors have no support or funding to report.

**Competing Interests:** The authors have declared that no competing interests exist.

\* E-mail: svsubram@hsph.harvard.edu

## Introduction

It is commonly asserted that low- to middle-income countries (LMICs) are characterized by the coexistence of underweight and overweight [1–4], referred to as the “double burden of malnutrition”. Furthermore, studies in LMICs have suggested that burdens of overweight and obesity has or will shift to lower socioeconomic status (SES) groups as countries develop economically, exposing these groups simultaneously to under- and overnutrition [5–6]. Therefore, it is imperative that the patterning of underweight and overweight be examined in transitioning LMICs to inform health policies for the management of the nutrition-related burden of disease [7–8]. Although the double burden of malnutrition is plausible within the context of epidemiologic transition away from a predominance of nutritional deficiencies towards a greater burden of noncommunicable disease [8–9], the majority of studies that have thus far reported the coexistence of underweight and overweight within populations have been based on the prevalence of these conditions, making

their interpretation problematic without an appropriate reference by which to determine the occurrence of a double burden [5,10–19]. An overview of studies among men and women in transitional countries from Latin America, Asia, and Africa that have reported the coexistence of underweight and overweight using prevalence is presented in **Table 1**. A determination of the coexistence of underweight and overweight in a population can alternatively be made through a formal, multilevel examination of the residual covariance as a measure of the correlation in the prevalence of underweight and overweight at a given geographic level [20]. A strong negative correlation, at a given geographic scale, would suggest the absence of coexistence of underweight and overweight, while a strong positive correlation would suggest the simultaneous presence of the twin burden of nutrition. To our knowledge, we are not aware of any formal empirical assessment of the coexistence of underweight and overweight that is comparable between countries and small areas within countries. Using the largest available, comparable, and most recent sample of adult women in the reproductive age group from 57 LMICs with

**Table 1.** Studies reporting a double burden of nutrition among adults in low- to middle-income countries.

| Country           | Year      | Sample (n)            | Age group (years) | Body Mass Index (BMI, kg/m <sup>2</sup> ) |                              | % Underweight |         | % Overweight/Obese |         |
|-------------------|-----------|-----------------------|-------------------|-------------------------------------------|------------------------------|---------------|---------|--------------------|---------|
|                   |           |                       |                   | Underweight Criterion                     | Overweight/obese Criterion   | Males         | Females | Males              | Females |
| Latin America     |           |                       |                   |                                           |                              |               |         |                    |         |
| Brazil [10]       | 1989      | 7160                  | 20–64             | <18.5                                     | ≥30.0                        | -             | 6.6     | 4.6                | 12.3    |
| Brazil            | 1997      | 5137                  | 20–64             | <18.5                                     | ≥30.0                        | -             | 6.0     | 6.9                | 12.7    |
| Mexico [11]       | 1994      | 2125                  | 20–69             | <18.5                                     | 25–29.9                      | 1.9           | 1.5     | 36.1               | 35.8    |
| Mexico            | 2000      | 45249                 | 20–75             | <18.5                                     | 25–29.9                      | 1.8           | 1.7     | 40.5               | 36.1    |
| Asia              |           |                       |                   |                                           |                              |               |         |                    |         |
| Bangladesh [12]   | 2004      | 242433 (Rural)        | 15–45             | <18.5                                     | ≥25.0                        | -             | 38.8    | -                  | 4.1     |
| Bangladesh        | 2004      | 39749 (Urban poor)    | 15–45             | <18.5                                     | ≥25.0                        | -             | 29.7    | -                  | 9.1     |
| China [13]        | 1989      | 4527                  | 20–45             | <18.5                                     | ≥25.0                        | 8.4           | 8.9     | 6.5                | 11.4    |
| China             | 2000      | 4046                  | 20–45             | <18.5                                     | ≥25.0                        | 6.3           | 6.7     | 20.2               | 19.3    |
| India [14]        | 1994      | 99598 (Urban)         | 35+               | <18.5                                     | ≥25.0                        | 19.5          | 19.1    | 19.2               | 29.7    |
| India [15]        | 2001      | 4032                  | 15–49             | <18.5                                     | ≥25.0                        | -             | 37.0    | -                  | 12.0    |
| Indonesia [16]*   | 2007      | -                     | ≥15               | <18.5                                     | ≥25.0                        | 15.0          | 19.0    |                    |         |
| Vietnam [17]      | 2000      | 14452                 | 25–64             | <18.5                                     | ≥25.0                        | 22.0          | 27.9    | 2.8                | 5.5     |
| Vietnam           | 2005      | 17213                 | 25–64             | <18.5                                     | ≥25.0                        | 19.9          | 21.9    | 5.3                | 8.0     |
| Africa            |           |                       |                   |                                           |                              |               |         |                    |         |
| Egypt [11]        | 2004      | 19201                 | ≥20               | 17.0–18.5                                 | 25.0–29.9                    | 2.8           | 2.0     | 35.4               | 26.9    |
| Gambia [18]*      | 1996–1997 | 5373                  | ≥15               | <18.0                                     | ≥30.0                        | 18.0          | 2.3     |                    |         |
| South Africa [19] | 1990      | 976 (Cape Peninsula)  | 15–64             | <20.0 (male), <19.0 (female)              | ≥25.0 (male), ≥24.0 (female) | 26.3          | 9.8     | 17.7               | 35.2    |
| LMICs (Urban) [6] | 1997      | 157844 (36 countries) | 20–49             | <18.5                                     | ≥25.0                        | -             | 5.9     | -                  | 32.4    |
| LMICs (Rural)     | -         | -                     | -                 | -                                         | -                            | -             | 9.3     | -                  | 19.4    |

## Notes:

\*Male and Female populations combined.

doi:10.1371/journal.pone.0025120.t001

objective measurements of height and weight, we assessed the extent to which underweight and overweight coexist in the general population and among low SES groups, at both the country-level and at the level of neighborhoods within countries. In a sub-set of countries, we also assessed whether the observed patterns of coexistence have changed over time.

## Methods

### Data

Data were obtained from single and repeated cross-sectional Demographic and Health Surveys (DHS) conducted between 1992 and 2008 in 57 LMICs (**Table 2**) [21]. The MEASURE DHS project has provided assistance in conducting standardized household sample surveys in LMICs since 1984 with a focus on health, socioeconomic, nutrition, and fertility-related information from all women in the reproductive age group (15–49 years) [22]. In some DHS surveys, the population was limited to ever-married women of reproductive age with children. Strengths of the DHS data for studying population health include very high response rates, national coverage, standard data collection procedures, and interviewer training [23–25]. The core DHS questionnaire has been standardized and pretested to ensure comparability across populations and over time. The DHS program has developed a rigorous area-based sampling design which employs multistage stratification and probabilistic sampling with each areal unit

having a defined probability of selection [26]. In each included survey, sampling was stratified according to urban and rural areas and in some countries by additional geographic or administrative regions. The general DHS sampling framework was adapted to produce country-specific sample designs [26]. **Table 2** describes each survey by country and year, sample sizes, number of neighborhoods, and the percentage prevalence of underweight and overweight for all women aged 20 to 49 years. For 36 countries with repeated surveys, 2 rows are provided indicating the first and most recent survey conducted in that country. **Table S1** describes the sampling plans for each survey by country and year, including response rates and anthropometric (height and weight) measurement protocol.

### Study population and sample size

The study population included all non-pregnant women between the ages of 20–49 years either with or without children of any age ( $n = 567047$ ) and was derived from the most recent survey in all countries participating in the DHS anthropometric measurement module. There were 109981 (19.4% of the sample) women for whom height and weight was intentionally not measured (see **Table S1** for anthropometric measurement protocol by survey). Among those for whom height or weight should have been measured, 5682 women (1.2%) did not have a height or weight measure in the data, and 34 women (<1%) had a biologically implausible height (less than 100 cm or greater than

**Table 2.** Survey year, sample size, number of neighborhoods, and distribution of nutritional status for women aged 20–49 in 57 low- to middle-income countries.

| Country                        | Survey Year   | Sample Size   |          | Nutritional status according to body mass index (BMI, kg/m <sup>2</sup> ) classification |      |                        |      |                  |      |
|--------------------------------|---------------|---------------|----------|------------------------------------------------------------------------------------------|------|------------------------|------|------------------|------|
|                                |               | Neighborhoods |          | Underweight (<18.5)                                                                      |      | Normal BMI (18.5–24.9) |      | Overweight (≥25) |      |
|                                |               | <i>n</i>      | <i>n</i> | <i>N</i>                                                                                 | %    | <i>n</i>               | %    | <i>n</i>         | %    |
| Total (latest survey)          | 2005 (median) | 451321        | 32814    | 53713                                                                                    | 11.9 | 254549                 | 56.4 | 143059           | 31.7 |
| Albania                        | 2008          | 5898          | 450      | 90                                                                                       | 1.5  | 3143                   | 53.3 | 2665             | 45.2 |
| Armenia                        | 2005          | 5058          | 308      | 178                                                                                      | 3.5  | 2351                   | 46.5 | 2529             | 50.0 |
|                                | 2000          | 4891          | 259      | 131                                                                                      | 2.7  | 2443                   | 49.9 | 2317             | 47.4 |
| Azerbaijan                     | 2006          | 6461          | 318      | 212                                                                                      | 3.3  | 2794                   | 43.2 | 3455             | 53.5 |
| Bangladesh                     | 2007          | 9028          | 361      | 2504                                                                                     | 27.7 | 5169                   | 57.3 | 1355             | 15.0 |
|                                | 1996          | 3375          | 313      | 1729                                                                                     | 51.2 | 1535                   | 45.5 | 111              | 3.3  |
| Benin                          | 2006          | 12280         | 750      | 1034                                                                                     | 8.4  | 8757                   | 71.3 | 2489             | 20.3 |
|                                | 1996          | 2136          | 200      | 314                                                                                      | 14.7 | 1627                   | 76.2 | 195              | 9.1  |
| Bolivia                        | 2003          | 12300         | 999      | 140                                                                                      | 1.1  | 5222                   | 42.5 | 6938             | 56.4 |
|                                | 1994          | 2127          | 555      | 46                                                                                       | 2.2  | 1345                   | 63.2 | 736              | 34.6 |
| Brazil                         | 1996          | 2883          | 759      | 174                                                                                      | 6.0  | 1702                   | 59.0 | 1007             | 34.9 |
| Burkina Faso                   | 2003          | 8478          | 400      | 1663                                                                                     | 19.6 | 5986                   | 70.6 | 829              | 9.8  |
|                                | 1992          | 3189          | 230      | 426                                                                                      | 13.4 | 2430                   | 76.2 | 333              | 10.4 |
| Cambodia                       | 2005          | 6147          | 557      | 1093                                                                                     | 17.8 | 4357                   | 70.9 | 697              | 11.3 |
|                                | 2000          | 5292          | 471      | 1011                                                                                     | 19.1 | 3897                   | 73.6 | 384              | 7.3  |
| Cameroon                       | 2005          | 3467          | 461      | 181                                                                                      | 5.2  | 2154                   | 62.1 | 1132             | 32.7 |
|                                | 1998          | 1426          | 200      | 95                                                                                       | 6.7  | 972                    | 68.2 | 359              | 25.2 |
| Central African Republic (CAR) | 1995          | 1760          | 229      | 272                                                                                      | 15.5 | 1367                   | 77.7 | 121              | 6.9  |
| Chad                           | 2004          | 2618          | 196      | 541                                                                                      | 20.7 | 1782                   | 68.1 | 295              | 11.3 |
|                                | 1996          | 3261          | 246      | 684                                                                                      | 21.0 | 2332                   | 71.5 | 245              | 7.5  |
| Colombia                       | 2005          | 27654         | 3792     | 1014                                                                                     | 3.7  | 13353                  | 48.3 | 13287            | 48.0 |
|                                | 1995          | 3065          | 897      | 102                                                                                      | 3.3  | 1683                   | 54.9 | 1280             | 41.8 |
| Comoros                        | 1996          | 743           | 98       | 72                                                                                       | 9.7  | 519                    | 69.9 | 152              | 20.5 |
| Congo, Dem. Rep.               | 2007          | 3308          | 300      | 502                                                                                      | 15.2 | 2337                   | 70.6 | 469              | 14.2 |
| Congo, Rep.                    | 2005          | 4874          | 225      | 550                                                                                      | 11.3 | 2906                   | 59.6 | 1418             | 29.1 |
| Cote d'Ivoire                  | 1998–9        | 2005          | 140      | 136                                                                                      | 6.8  | 1316                   | 65.6 | 553              | 27.6 |
|                                | 1994          | 2682          | 246      | 226                                                                                      | 8.4  | 2049                   | 76.4 | 407              | 15.2 |
| Dominican Republic             | 1996          | 5820          | 395      | 366                                                                                      | 6.3  | 2906                   | 49.9 | 2548             | 43.8 |
| Egypt                          | 2008          | 14411         | 1263     | 89                                                                                       | 0.6  | 3223                   | 22.4 | 11099            | 77.0 |
|                                | 1995          | 6497          | 921      | 124                                                                                      | 1.9  | 3125                   | 48.1 | 3248             | 50.0 |
| Ethiopia                       | 2005          | 4644          | 534      | 1144                                                                                     | 24.6 | 3165                   | 68.2 | 335              | 7.2  |
|                                | 2000          | 10523         | 539      | 3031                                                                                     | 28.8 | 6850                   | 65.1 | 642              | 6.1  |
| Gabon                          | 2000          | 2082          | 247      | 141                                                                                      | 6.8  | 1373                   | 65.9 | 568              | 27.3 |
| Ghana                          | 2008          | 3490          | 411      | 243                                                                                      | 7.0  | 2112                   | 60.5 | 1135             | 32.5 |
|                                | 1993          | 1650          | 388      | 193                                                                                      | 11.7 | 1236                   | 74.9 | 221              | 13.4 |
| Guatemala                      | 1998–9        | 4547          | 405      | 149                                                                                      | 3.3  | 2928                   | 64.4 | 1470             | 32.3 |
| Guinea                         | 2005          | 2834          | 295      | 342                                                                                      | 12.1 | 2061                   | 72.7 | 431              | 15.2 |
|                                | 1999          | 2983          | 292      | 345                                                                                      | 11.6 | 2239                   | 75.1 | 399              | 13.4 |
| Haiti                          | 2005–6        | 3632          | 339      | 453                                                                                      | 12.5 | 2260                   | 62.2 | 919              | 25.3 |
|                                | 1994          | 1788          | 171      | 327                                                                                      | 18.3 | 1241                   | 69.4 | 220              | 12.3 |
| Honduras                       | 2005          | 13988         | 1046     | 366                                                                                      | 2.6  | 6555                   | 46.9 | 7067             | 50.5 |
| India                          | 2005          | 91243         | 3849     | 24281                                                                                    | 26.6 | 50367                  | 55.2 | 16595            | 18.2 |
|                                | 1998          | 72469         | 3473     | 22860                                                                                    | 31.5 | 40182                  | 55.4 | 9427             | 13.0 |

Table 2. Cont.

| Country         | Survey Year | Sample Size   |          | Nutritional status according to body mass index (BMI, kg/m <sup>2</sup> ) classification |      |                        |      |                  |      |
|-----------------|-------------|---------------|----------|------------------------------------------------------------------------------------------|------|------------------------|------|------------------|------|
|                 |             | Neighborhoods |          | Underweight (<18.5)                                                                      |      | Normal BMI (18.5–24.9) |      | Overweight (≥25) |      |
|                 |             | <i>n</i>      | <i>n</i> | <i>N</i>                                                                                 | %    | <i>n</i>               | %    | <i>n</i>         | %    |
| Jordan          | 2007        | 4446          | 464      | 55                                                                                       | 1.2  | 1265                   | 28.5 | 3126             | 70.3 |
|                 | 1997        | 3000          | 300      | 69                                                                                       | 2.3  | 1070                   | 35.7 | 1861             | 62.0 |
| Kazakhstan      | 1999        | 1880          | 205      | 117                                                                                      | 6.2  | 1086                   | 57.8 | 677              | 36.0 |
|                 | 1995        | 2900          | 176      | 180                                                                                      | 6.2  | 1486                   | 51.2 | 1234             | 42.6 |
| Kenya           | 2003        | 6046          | 398      | 656                                                                                      | 10.9 | 3605                   | 59.6 | 1785             | 29.5 |
|                 | 1998        | 3009          | 526      | 333                                                                                      | 11.1 | 2205                   | 73.3 | 471              | 15.7 |
| Kyrgyz Republic | 1997        | 2871          | 162      | 151                                                                                      | 5.3  | 1840                   | 64.1 | 880              | 30.7 |
| Lesotho         | 2004        | 2401          | 403      | 103                                                                                      | 4.3  | 1172                   | 48.8 | 1126             | 46.9 |
| Liberia         | 2007        | 4991          | 298      | 405                                                                                      | 8.1  | 3373                   | 67.6 | 1213             | 24.3 |
| Madagascar      | 2003–4      | 5909          | 594      | 1453                                                                                     | 24.6 | 3961                   | 67.0 | 495              | 8.4  |
|                 | 1997        | 2253          | 265      | 431                                                                                      | 19.1 | 1710                   | 75.9 | 112              | 5.0  |
| Malawi          | 2004        | 7746          | 521      | 618                                                                                      | 8.0  | 5969                   | 77.1 | 1159             | 15.0 |
|                 | 1992        | 2101          | 225      | 169                                                                                      | 8.0  | 1684                   | 80.2 | 248              | 11.8 |
| Mali            | 2006        | 9774          | 406      | 1018                                                                                     | 10.4 | 6631                   | 67.8 | 2125             | 21.7 |
|                 | 1995        | 3787          | 300      | 602                                                                                      | 15.9 | 2823                   | 74.5 | 362              | 9.6  |
| Moldova         | 2005        | 5709          | 400      | 199                                                                                      | 3.5  | 2715                   | 47.6 | 2795             | 49.0 |
| Morocco         | 2003–4      | 12713         | 480      | 668                                                                                      | 5.3  | 6681                   | 52.6 | 5364             | 42.2 |
|                 | 1992        | 2795          | 211      | 109                                                                                      | 3.9  | 1758                   | 62.9 | 928              | 33.2 |
| Mozambique      | 2003        | 8327          | 604      | 615                                                                                      | 7.4  | 6260                   | 75.2 | 1452             | 17.4 |
|                 | 1997        | 2823          | 392      | 251                                                                                      | 8.9  | 2253                   | 79.8 | 319              | 11.3 |
| Namibia         | 2006–7      | 6916          | 500      | 835                                                                                      | 12.1 | 3733                   | 54.0 | 2348             | 34.0 |
|                 | 1992        | 2061          | 162      | 276                                                                                      | 13.4 | 1364                   | 66.2 | 421              | 20.4 |
| Nepal           | 2006        | 7833          | 260      | 1808                                                                                     | 23.1 | 5277                   | 67.4 | 748              | 9.5  |
|                 | 1996        | 3068          | 253      | 767                                                                                      | 25.0 | 2238                   | 72.9 | 63               | 2.1  |
| Nicaragua       | 2001        | 9098          | 610      | 230                                                                                      | 2.5  | 3990                   | 43.9 | 4878             | 53.6 |
|                 | 1997        | 9290          | 592      | 284                                                                                      | 3.1  | 4600                   | 49.5 | 4406             | 47.4 |
| Niger           | 2006        | 3126          | 342      | 445                                                                                      | 14.2 | 2005                   | 64.1 | 676              | 21.6 |
|                 | 1998        | 2958          | 267      | 556                                                                                      | 18.8 | 2075                   | 70.1 | 327              | 11.1 |
| Nigeria         | 2008        | 23063         | 886      | 2519                                                                                     | 10.9 | 14981                  | 65.0 | 5563             | 24.1 |
|                 | 2003        | 5029          | 362      | 598                                                                                      | 11.9 | 3258                   | 64.8 | 1173             | 23.3 |
| Peru            | 2004        | 20943         | 1285     | 237                                                                                      | 1.1  | 9234                   | 44.1 | 11472            | 54.8 |
|                 | 1991        | 4886          | 876      | 61                                                                                       | 1.2  | 2917                   | 59.7 | 1908             | 39.1 |
| Rwanda          | 2005        | 3911          | 462      | 295                                                                                      | 7.5  | 3119                   | 79.7 | 497              | 12.7 |
|                 | 2000        | 6628          | 441      | 451                                                                                      | 6.8  | 5159                   | 77.8 | 1018             | 15.4 |
| Senegal         | 2005        | 3059          | 376      | 393                                                                                      | 12.8 | 1893                   | 61.9 | 773              | 25.3 |
| Sierra Leone    | 2008        | 2692          | 353      | 273                                                                                      | 10.1 | 1545                   | 57.4 | 874              | 32.5 |
| South Africa    | 1998        | 4263          | 935      | 241                                                                                      | 5.7  | 1652                   | 38.8 | 2370             | 55.6 |
| Swaziland       | 2006        | 3412          | 274      | 60                                                                                       | 1.8  | 1331                   | 39.0 | 2021             | 59.2 |
| Tanzania        | 2004–5      | 7064          | 475      | 698                                                                                      | 9.9  | 4928                   | 69.8 | 1438             | 20.4 |
|                 | 1996        | 3502          | 354      | 331                                                                                      | 9.5  | 2689                   | 76.8 | 482              | 13.8 |
| Togo            | 1998        | 3113          | 282      | 343                                                                                      | 11.0 | 2435                   | 78.2 | 335              | 10.8 |
| Turkey          | 1998        | 2210          | 460      | 52                                                                                       | 2.4  | 949                    | 42.9 | 1209             | 54.7 |
|                 | 1993        | 2294          | 463      | 49                                                                                       | 2.1  | 1046                   | 45.6 | 1199             | 52.3 |
| Uganda          | 2006        | 1925          | 367      | 221                                                                                      | 11.5 | 1376                   | 71.5 | 328              | 17.0 |
|                 | 1995        | 2827          | 293      | 254                                                                                      | 9.0  | 2246                   | 79.4 | 327              | 11.6 |
| Uzbekistan      | 1996        | 3182          | 168      | 233                                                                                      | 7.3  | 2039                   | 64.1 | 910              | 28.6 |

Table 2. Cont.

| Country  | Survey Year | Sample Size   |          | Nutritional status according to body mass index (BMI, kg/m <sup>2</sup> ) classification |     |                        |      |                  |      |
|----------|-------------|---------------|----------|------------------------------------------------------------------------------------------|-----|------------------------|------|------------------|------|
|          |             | Neighborhoods |          | Underweight (<18.5)                                                                      |     | Normal BMI (18.5–24.9) |      | Overweight (≥25) |      |
|          |             | <i>n</i>      | <i>n</i> | <i>N</i>                                                                                 | %   | <i>n</i>               | %    | <i>n</i>         | %    |
| Zambia   | 2007        | 4846          | 319      | 391                                                                                      | 8.1 | 3393                   | 70.0 | 1062             | 21.9 |
|          | 1996        | 3483          | 312      | 328                                                                                      | 9.4 | 2715                   | 78.0 | 440              | 12.6 |
| Zimbabwe | 2005–6      | 6199          | 398      | 451                                                                                      | 7.3 | 3946                   | 63.7 | 1802             | 29.1 |
|          | 1994        | 1774          | 230      | 95                                                                                       | 5.4 | 1276                   | 71.9 | 403              | 22.7 |

Notes: Percent underweight represents the number of women with a BMI of less than 18.5 divided by the total number of women and then multiplied by 100; percent normal weight represent percent overweight represents the number of women with a BMI between 18.5 and 24.9 divided by the total number of and then multiplied by 100; percent overweight represents the number of women with a BMI of 25 and above divided by the total number of women and then multiplied by 100.

Percentages are calculated as row percentages.

doi:10.1371/journal.pone.0025120.t002

200 cm) or weight (less than 25 kg or greater than 200 kg) and were excluded. Twenty nine observations (<1%) were missing data on covariates.

The final sample for the primary analysis was 451321 adult women surveyed and measured between 1994 and 2008 in 57 countries. For the secondary analysis on a subset of 36 countries, a sample of 197822 women was available from the first survey conducted in these countries and a sample of 363264 women was available from the most recent survey conducted.

## Outcome

Trained field investigators weighed each woman using a solar-powered electronic scale with a precision of  $\pm 100$  g, and height was measured for each woman using an adjustable measuring board accurate to 1 millimeter [27]. Body Mass Index (BMI), calculated as weight in kilograms divided by the square of height in meters (kg/m<sup>2</sup>) was used to classify women as underweight (BMI<18.5), normal (BMI 18.5–24.5), and overweight (BMI≥25.0) according to WHO recommendations [28].

## Independent Variables

The following covariates were considered in our analyses: age, education, household wealth (as a measure of SES), and place of residence (urban or rural). Age (20–49 y) was specified in 5-y groups. Women's education level was categorized as: no education, primary education, or having completed secondary or higher level education. Women's SES was based on a household wealth index derived from dwelling characteristics (e.g. source of drinking water) and ownership of material possessions (e.g., television, bicycle) with each woman assigned a wealth score based on the weighted combination of characteristics and assets in their household with the weights derived according to a principle component analysis (PCA) procedure [29]. We used the survey-specific household wealth index that was provided by the DHS. For each survey, PCA was conducted on the set of indicator variables representing each household characteristic or asset. Then, for each household, the values of the indicator variables were multiplied by the coefficient from the first principle component, summed, and standardized to produce the household wealth index value with a mean of 0 and a standard deviation of 1. For each survey, the sample was divided into fifths from richest to poorest along the resulting standardized index [30–32]. Place of residence indicated whether the household was located in an urban or rural area by census definition.

## Defining Small Areas (“Neighborhood”) within Countries

DHS surveys make use of area-based sampling and cover the entire geographical territory of each country. The cluster is the smallest unit used in the DHS area sampling frames. Sampling frames were obtained from existing country master samples, or lists of enumeration areas from a recently completed census [26]. Selected clusters to be included in the survey were checked for completeness and lists of dwellings, households, and individuals were created by field teams in each country. Larger clusters were further segmented into the DHS standard size of about 500 individuals or 100–150 households during fieldwork. For the present study, clusters, typically villages or groups of villages in rural areas and municipal wards or divisions in urban areas were taken to represent a women's residential context. In addition to being of similar size, clusters were defined using meaningful geographic characteristics and natural borders such as rivers or mountains or other identifiable boundaries such as roads, railways, or eclectic power lines [26]. Clusters in many countries follow administrative boundaries which provide practical relevance for defining residential context.

## Analysis

Given the multilevel structure of the data and with an explicit interest in modeling the multiple categories of BMI and their correlation at the geographic level of countries and neighborhoods within countries, a multilevel multinomial modeling approach was adopted [20,33–34]. Formally,  $y_{ijk}$  was the categorical outcome with  $t$  categories, for woman  $i$  in neighborhood  $j$  and country  $k$ . We denote the probability of being in BMI category  $s$  by  $\pi_{ijk}^{(s)} = \Pr(y_{ijk} = s)$ . In a multinomial logistic model, one of the outcome categories is taken as the reference categories, just as the category coded ‘0’ is normally taken as the ‘reference’ category in more the commonly used binary response models. Using the normal weight category of BMI (18.5–24.9 kg/m<sup>2</sup>) as the reference, we estimated a set of  $t-1$  logistic regressions for the underweight and overweight categories, contrasting each of the categories with the reference category as:  $\log \left( \frac{\pi_{ijk}^{(s)}}{\pi_{ijk}^{(0)}} \right) = \beta_0^{(s)} + \beta_1^{(s)} x_{ijk} + (u_{jk}^{(s)} + v_k^{(s)})$ , where  $s = 1, \dots, t-1$ . Separate intercept and slope parameters were estimated for the underweight and overweight categories, indicated by the  $(s)$  superscripts. The notation  $\beta_0^{(s)} + \beta_1^{(s)} X$  represents the fixed part of the model, and  $\beta_0^{(s)}$ , the intercept, gives the overall log odds of being underweight (or overweight) for an individual in the reference category and

$\beta^{(s)}$   $X$  is the effect of a 1-unit increase in  $X$  (the set of predictor variables) on the log odds of being underweight (or overweight) contrasted with the reference category (normal weight). The terms  $u_{jk}^{(s)}$  and  $v_k^{(s)}$  represent the random effects associated with neighborhoods and countries, assumed to be Normally distributed with mean 0 and variances,  $\sigma_u^{2(s)}$  and  $\sigma_v^{2(s)}$ . The random effects are specific to each of the contrasted category, as indicated by the  $s$  superscript, because different unobserved factors, at each level, may affect each contrast. The covariance in the random effects for underweight ( $s$ ) and overweight ( $r$ ) can be estimated at each level, for example,  $\text{cov}(v_k^{(s)}, v_k^{(r)})$  for the country level, and is the key parameter of interest for our study. For ease of interpretation, covariances are presented in terms of correlation coefficients ( $r$ ), and vary between  $-1$  and  $1$ .

We additionally estimated country-specific 2-level models (women within neighborhoods) for each country and repeated all models separately for urban and rural samples. To assess the correlation in underweight and overweight among women of low socioeconomic status (SES), we also estimated global and country-specific models restricted to the poorest quarter of women, based on household wealth. Finally, we conducted sensitivity analyses by repeating the global and country-specific models on samples of men (aged 15–54 y) from seven countries in this study (Azerbaijan, Egypt, India, Swaziland, Uganda, Colombia, and South Africa) where anthropometric measurements were available for adult men in surveyed households. In all analyses, regression and variance parameters were estimated using Markov chain Monte Carlo (MCMC) simulation and the Metropolis-Hastings algorithm, available in the statistical software *MLwiN* (version 2.20) [33,35–36].

## Ethical Review

The DHS data collection procedures were approved by the ORC Macro (Calverton, Maryland) Institutional Review Board as well as by the relevant body in each country which approves research studies on human subjects. Oral informed consent for the interview/survey was obtained from respondents by interviewers. The study was reviewed by Harvard School of Public Health Institutional Review Board and was considered exempt from full review because the study was based on an anonymous public use data set with no identifiable information on the survey participants.

## Results

In the pooled sample, the prevalence of underweight and overweight was 11.9% and 31.7%, respectively in the most recent survey (**Table 1**). Within countries, underweight ranged from <1% (Egypt) to 27.7% (Bangladesh) and overweight ranged from 6.9% (Central African Republic) to 77.0% (Egypt). **Figure 1** displays the patterning of underweight and overweight across the 57 countries studied. Several countries including Chad, India, Namibia, Senegal, Niger, and Sierra Leone appeared to have a sizeable prevalence of underweight and overweight in their populations (Table 1). Among the 36 countries where repeated surveys were available, the prevalence of overweight increased in 92% at an average rate of 6.9% per year over median period of 10 years. Among the same countries the levels of underweight decreased in 64% (23/36) but at a much slower rate (<1% per year) over the same interval.

Globally, the country-level correlation between the underweight and overweight was  $-0.79$  ( $P < 0.001$ ) in the age-adjusted model. Further covariate adjustment did not alter the country-level correlation (**Figure 2A**, underweight/overweight  $r = -0.78$ ,  $P < 0.001$ ). These patterns were largely repeated among low SES

groups (**Figure 2B**). In these figures, a zero on each axis represents the global average for underweight and overweight. Countries estimated to have above average prevalence of both underweight and overweight would appear in the upper right quadrant of these plots. South Africa, Sierra Leone, Namibia, and additionally Brazil and Dominican Republic in the low SES model, were found to simultaneously have above average underweight and overweight at the national level.

In the pooled age-adjusted model that also accounted for between-country differences, neighborhoods with higher levels of underweight (overweight) were more likely to have lower levels of overweight (underweight) ( $r = -0.51$ ,  $P < 0.001$ ). Additional adjustment for socioeconomic status and place of residence covariates reduced the magnitude of this correlation, but it remained statistically significant ( $r = -0.31$ ,  $P < 0.001$ ).

Within-countries, age-adjusted models generally revealed an inverse correlation between underweight and overweight at the neighborhood-level, with statistically significant negative correlations observed that varied between  $-0.25$  ( $P = 0.019$ ) in Morocco to  $-0.90$  ( $P < 0.0001$ ) in Bangladesh (**Figure 3A**). Overall, negative correlations between underweight and overweight were observed at the neighborhood-level in 46 of the 57 countries, and correlations were statistically significant ( $P < 0.05$ ) in 29 countries (see **Table S2** for significance levels). Although positive correlations in age-adjusted models were observed in 8 countries (Albania, Guatemala, Honduras, Lesotho, Nicaragua, Swaziland, Tanzania, Turkey), none were found to be statistically significant.

Globally, the results of analyses restricted to low-SES were largely similar to the full analysis; negative correlations in underweight and overweight were observed at the country ( $r = -0.79$ ,  $P < 0.001$ , **Figure 2B**) and neighborhood ( $r = -0.45$ ,  $P < 0.001$ ) levels, with adjustment for age and place of residence (**Figure 3B**). Within countries, the inverse relationship was found to be statistically significant in 10/57 countries (see **Table S2** for significance levels). No countries were found to have a statistically significant positive correlation.

In global age-adjusted analyses restricted to 36 countries with repeated surveys, correlations between underweight and overweight at the country- and neighborhood-levels were negative, statistically significant, nearly identical over time (median interval: 10 years), and to the full sample results (**Table S3**). The change over time within countries is represented in **Figure 4**, which plots the underweight/overweight correlation from the first versus the most recent survey for countries with repeated surveys.

Within the subset of countries with repeated surveys, 18/36 were found to have a negative and statistically significant correlation at the neighborhood-level in the first available survey (median year: 1996) (**Table S3**). In the most recent survey (median year: 2005), 23/36 countries demonstrated a statistically significant negative correlation ( $P < 0.05$ ). Among 19/36 countries, the correlation was found to be negative and statistically significant at both time points (**Table S3**). Five countries with negative correlations at the first survey period (Jordan, Nicaragua, Peru, Tanzania, and Turkey) were found to have positive correlations in the most recent survey. The correlation between underweight and overweight among these countries did not reach statistical significance at either survey point and consecutive positive correlations were not observed for any countries over time.

We conducted several sensitivity analyses to explore the consistency of our findings. First, pooled and country-specific analyses were repeated on adult males (15–54 y) in a subset of 7 countries. The countries and sample sizes of males included in these analyses are presented in **Table 3**. The results of the pooled analysis for males showed an inverse relationship between



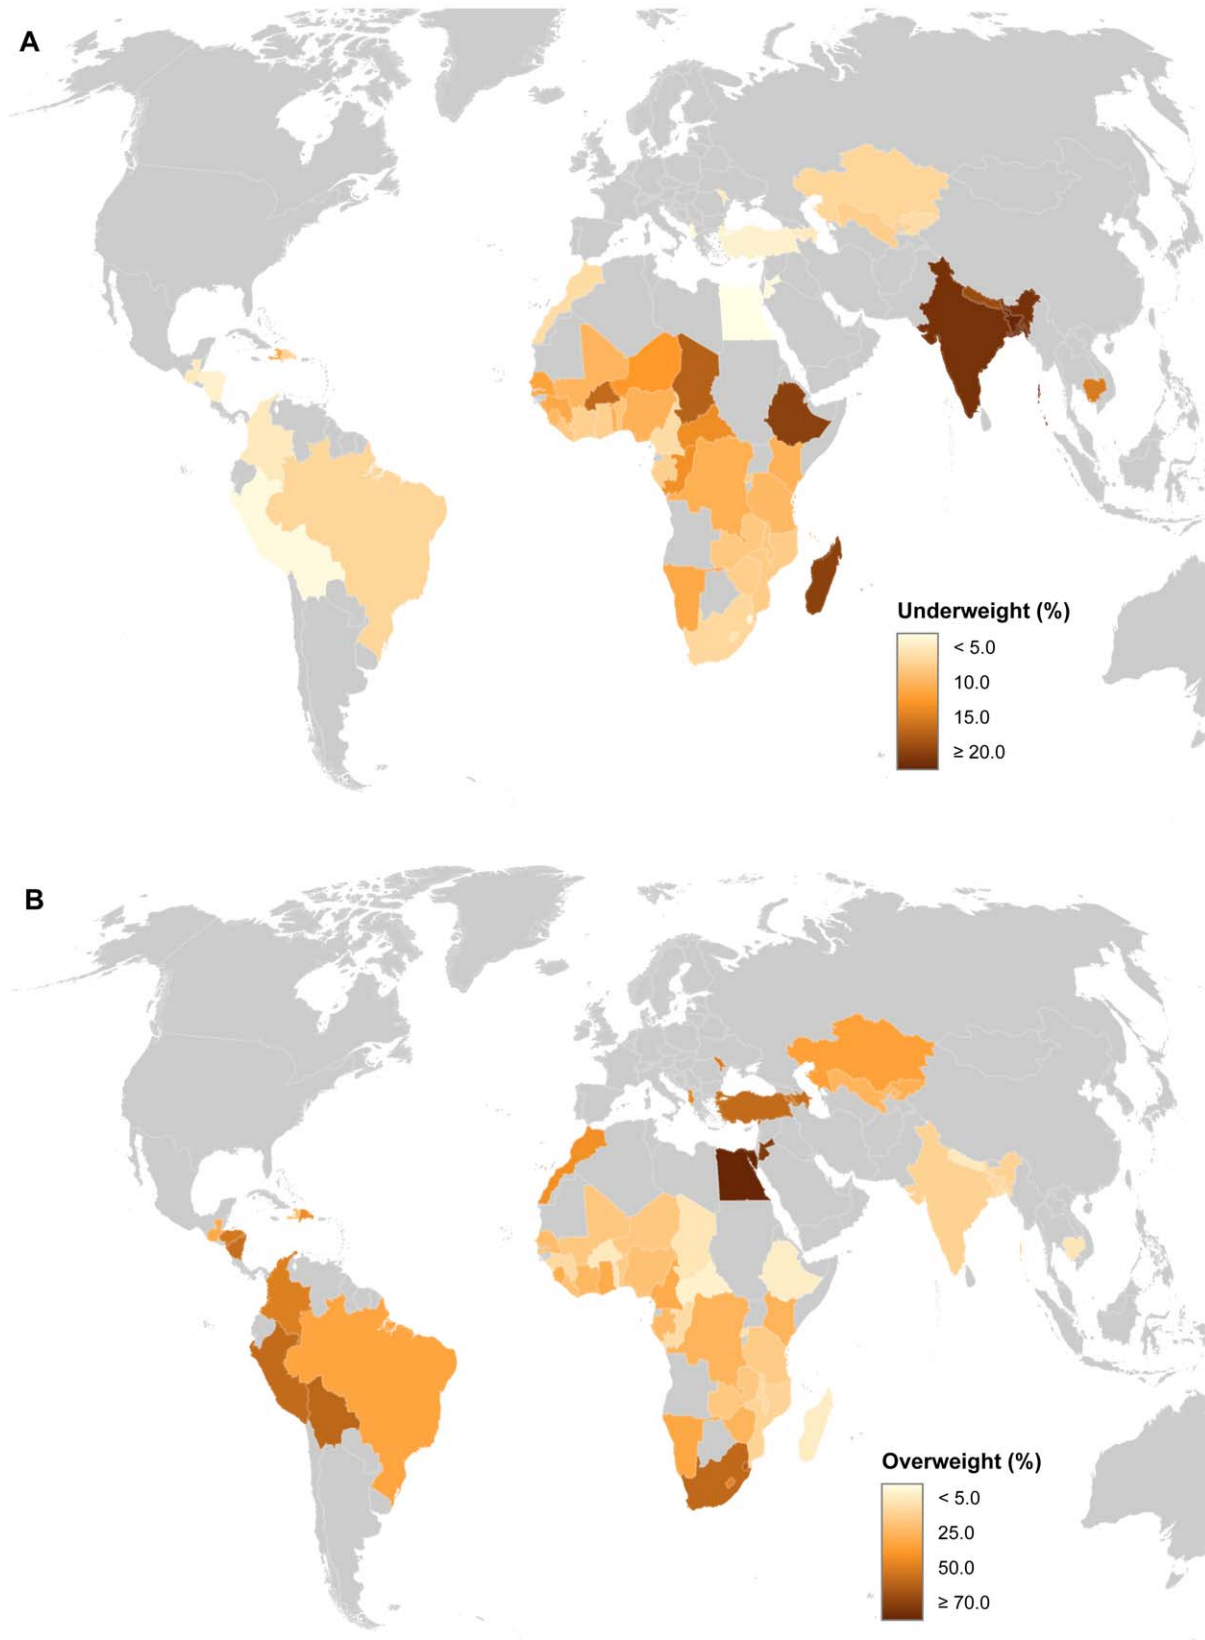

**Figure 1. Prevalence of underweight (BMI < 18.5 kg/m<sup>2</sup>) (A) and overweight (BMI ≥ 25.0 kg/m<sup>2</sup>) (B) among women aged 20–49 in 57 low- to middle-income countries.**  
doi:10.1371/journal.pone.0025120.g001

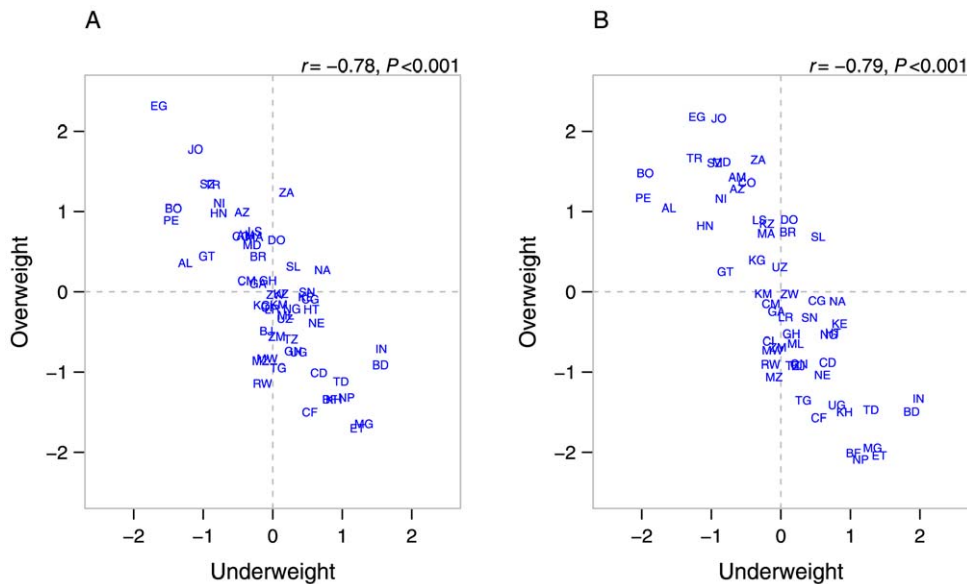

**Figure 2. Scatter plots of country-level residuals for underweight and overweight among women aged 20–49 in 57 low- to middle-income countries overall (A), and in low-socioeconomic status groups (B).** Notes: Panel A adjusted for age, education, household wealth, and place of residence, Panel B adjusted for age and urban/rural place of residence. **Country abbreviations:** AL Albania, AM Armenia, AZ Azerbaijan, BD Bangladesh, BJ Benin, BO Bolivia, BR Brazil, BF Burkina Faso, KH Cambodia, CM Cameroon, CF Central African Republic, TD Chad, CO Colombia, KM Comoros, CD Congo, Dem. Rep., CG Congo, Rep., CI Cote d'Ivoire, DO Dominican Republic, EG Egypt, ET Ethiopia, GA Gabon, GH Ghana, GT Guatemala, GN Guinea, HT Haiti, HN Honduras, IN India, JO Jordan, KZ Kazakhstan, KE Kenya, KG Kyrgyz Republic, LS Lesotho, LR Liberia, MG Madagascar, MW Malawi, ML Mali, MD Moldova, MA Morocco, MZ Mozambique, NA Namibia, NP Nepal, NI Nicaragua, NE Niger, NG Nigeria, PE Peru, RW Rwanda, SN Senegal, SL Sierra Leone, SZ Swaziland, TZ Tanzania, TG Togo, TR Turkey, UG Uganda, UZ Uzbekistan, ZM Zambia, ZW Zimbabwe, ZA South Africa.  
doi:10.1371/journal.pone.0025120.g002

underweight and overweight at the country-level similar to the corresponding analysis on females (**Figure 5**); although the finding for males was not statistically significant due to few countries. Within country analyses for males also demonstrated a similar pattern to the overall results, with negative and statistically significant correlations between underweight and overweight observed in 5/7 countries ( $P < 0.05$ , **Table 3**) For Colombia and South Africa, data on all adult males (aged 15+) was analyzed.

Second, we restricted the pooled country-level analyses to women with only preschool aged children, some preschool aged children, or no children, and to women of younger (15–24) and middle (25–49) ages. The results of these analyses are presented in **Table 4**. In fully adjusted models for these subgroups, a consistently inverse and statistically significant association was observed between underweight and overweight was observed at the country level that varied between  $-0.70$  and  $-0.78$ , compared to the correlation in the overall study sample of  $-0.78$  ( $P < 0.001$ ). Finally, additional analyses were conducted on the South African (1998) and Colombian (2004) and surveys which included women older than 50 years of age. These results are presented in **Table 5**. In both countries, the correlations for the different age strata were consistent with the overall findings; however the South African analysis had less statistical precision due to sample size limitations. Negative and statistically significant correlations of large magnitude ( $r < -0.8$ ) were observed among the older age groups in both countries, which may be reflective of older cohorts preceding the nutrition transition in these countries.

## Discussion

Using large representative samples of adult women of reproductive ages from 57 LMICs, we observed a robust negative

correlation between underweight and overweight globally across countries and for neighborhoods within a majority of countries. This finding was consistent in analyses stratified by urban/rural location. The inverse correlation was mirrored among low SES groups globally and within countries, suggesting that underweight and overweight are not happening simultaneously in this group. Among the subset of countries with multiple measurements, the negative correlations observed at the country and neighborhood levels did not appear to change substantially in direction or magnitude over time.

Before we discuss these findings, we discuss the data limitations of the study. First, our analyses were restricted to women of reproductive age, due to our use of the Demographic and Health Surveys as the data source. Despite this limitation the DHS offers many advantages including comparable survey instruments, standardization of anthropometric measurements, sampling procedures and other methodology that facilitate pooling across surveys. Several studies investigating the coexistence of underweight and overweight have been based on reproductive-aged women, and this is largely due to the target population of the Demographic and Health Surveys (women aged 15–49) which provide an important source of nutrition-related data for LMICs [6,37–40]. Whether the patterns observed in our study hold for women in other countries and of different ages and for adult men generally in comparable samples with objective measures of height and weight remains an open empirical question. The consistency of our findings among women of different age groups, with and without children, and among men (aged 15–54) in 7 countries during sensitivity analyses, however, suggests that our findings may be generalizable to other populations and settings. Second, the countries included in this study were not surveyed at the same time even though a majority of countries (45/57) were surveyed after



**A**

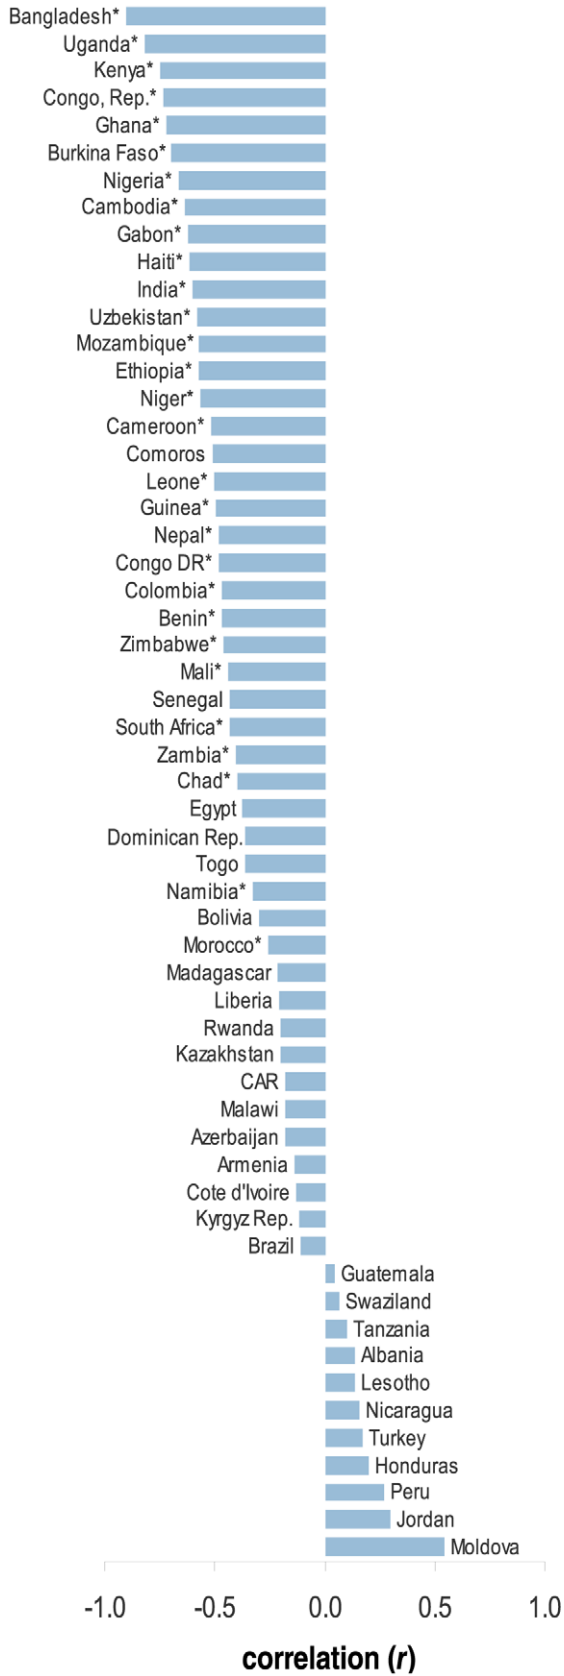

**B**

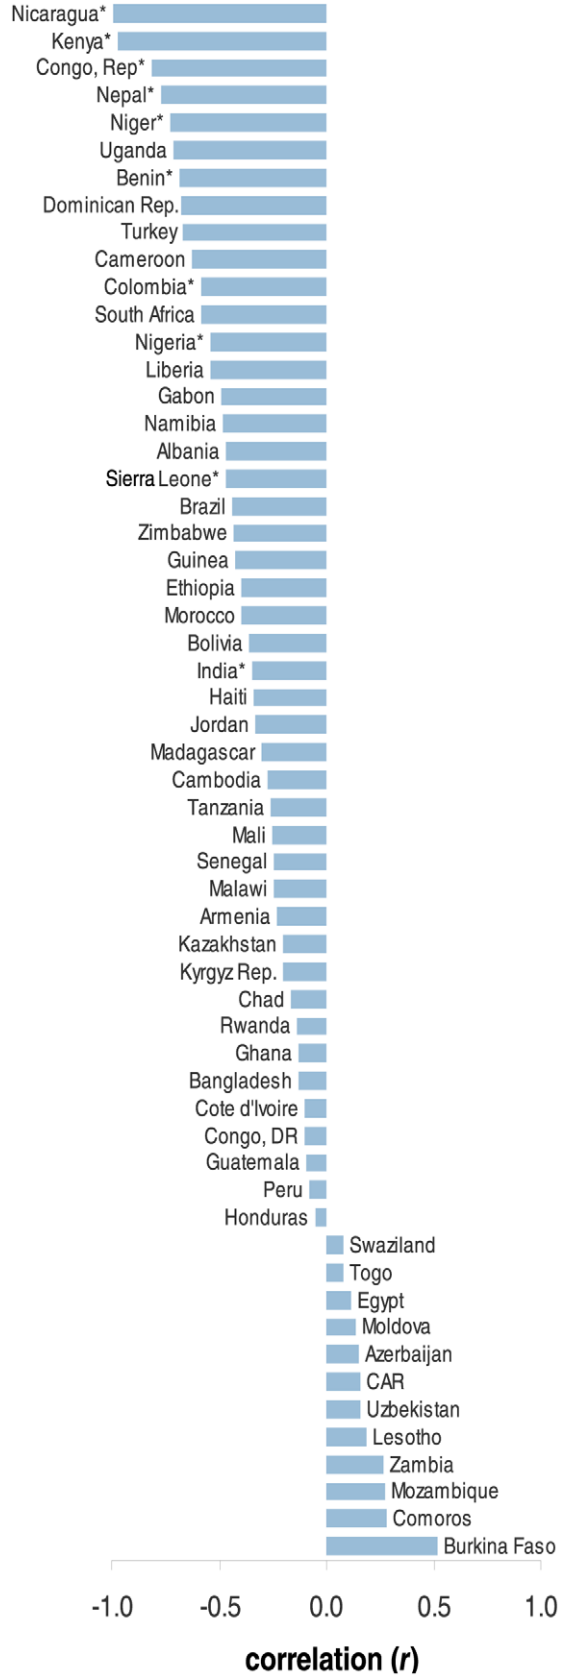



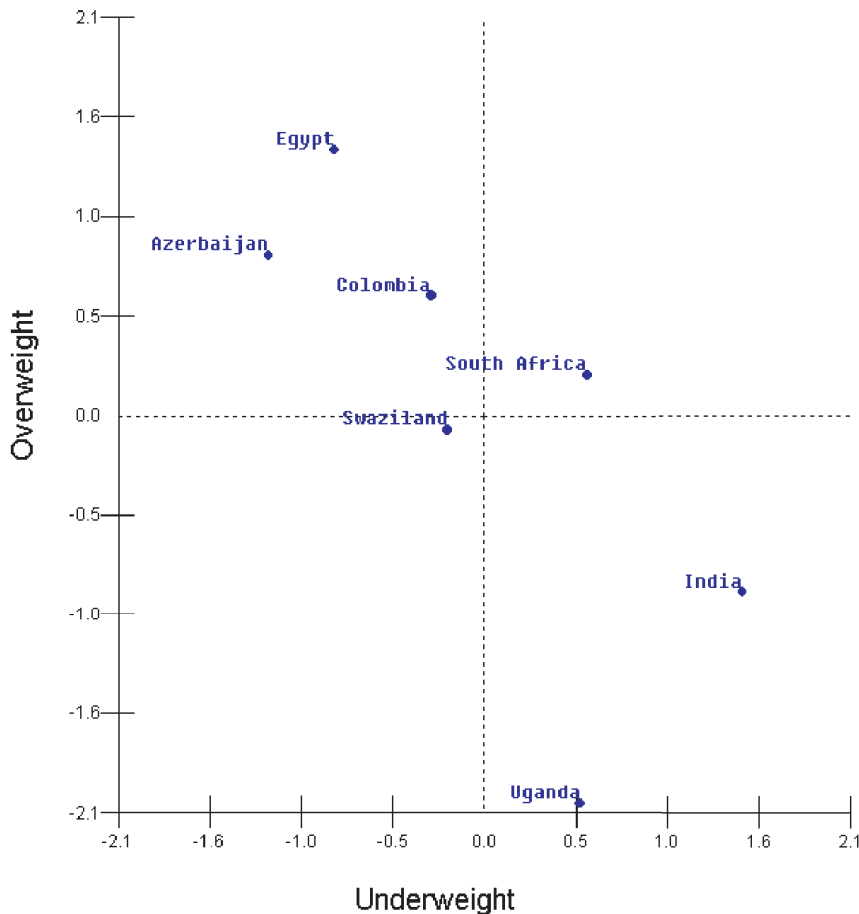

**Figure 5. Scatter plot of country-level residuals for underweight and overweight among men aged 15–54 in 7 low- to middle-income countries ( $r = -0.72$ ,  $P = 0.28$ ).**  
doi:10.1371/journal.pone.0025120.g005

relationship was found between change in neighborhood-level underweight/overweight correlation and pcGDP. Interestingly, other upper-middle income countries such as Colombia and Namibia demonstrated strong inverse and statistically significant correlations in underweight and overweight further suggesting that the double burden of malnutrition may be related to income-inequality within countries, rather than overall economic development [47].

Although many low and middle income countries face problems of underweight and overweight, the hypothesized “double burden” of malnutrition has not definitively occurred either among adult women of reproductive age in a majority of the LMICs studied or among adult males studied in a smaller group of countries. While the double burden of nutrition may indeed be forthcoming within the context of epidemiologic transition, such a characterization seems inappropriate at present for most LMICs in

**Table 4. Global (country level) age and fully adjusted correlation of underweight and overweight among women with and without children, and among women of younger and middle age groups in 57 low- to middle-income countries.**

| Case                                      | N      | Age adjusted      |            | Fully adjusted**  |            |
|-------------------------------------------|--------|-------------------|------------|-------------------|------------|
|                                           |        | Country-level $r$ | $P$ -value | Country-level $r$ | $P$ -value |
| Study sample*                             | 451322 | -0.79             | 0.000      | -0.78             | 0.000      |
| Women with all children 5 and younger     | 66042  | -0.73             | 0.000      | -0.70             | 0.000      |
| Women with at least 1 child 5 and younger | 250683 | -0.77             | 0.000      | -0.75             | 0.000      |
| Women without children                    | 48189  | -0.72             | 0.000      | -0.70             | 0.000      |
| Women aged 12–24 y                        | 210056 | -0.72             | 0.000      | -0.71             | 0.000      |
| Women aged 25–49 y                        | 353351 | -0.80             | 0.000      | -0.78             | 0.000      |

\*Notes: Study sample includes all non-pregnant women aged 20–49 and included women with and without children of any age.

\*\*Adjusted for age, education, household wealth, and place of residence.

doi:10.1371/journal.pone.0025120.t004

**Table 5.** Within country correlations between underweight and overweight among women of younger, middle, and older age groups in Colombia and South Africa.

| Case                 | Colombia |       |         | South Africa |       |         |
|----------------------|----------|-------|---------|--------------|-------|---------|
|                      | N        | r**   | P-value | N            | r**   | P-value |
| Study sample*        | 27062    | -0.55 | 0.000   | 4263         | -0.54 | 0.010   |
| Women aged 15–24 y   | 13063    | -0.76 | 0.000   | 2038         | -0.45 | 0.052   |
| Women aged 25–49 y   | 23607    | -0.71 | 0.000   | 3394         | -0.46 | 0.086   |
| Women aged 50+ years | 7575     | -0.80 | 0.018   | 2410         | -0.88 | 0.002   |

**Notes:**

\*Study sample includes all non-pregnant women aged 20–49 and included women with and without children of any age.

\*\*Correlations adjusted for age, education, household wealth, and place of residence.

doi:10.1371/journal.pone.0025120.t005

light of our findings of an explicitly inverse association between the prevalence of underweight and overweight at the level of countries and small geographic areas and, even more importantly, that underweight and overweight are unequivocally segregated into two separate socioeconomic groups [39,44]. The scientific and policy narratives related to the double burden of malnutrition in LMICs need to be evidence-based in order to be focused and fair.

## References

- Kapoor SK, Anand K (2002) Nutritional transition: a public health challenge in developing countries. *J Epidemiol Community Health* 56: 804–805.
- Lukito W, Wahlqvist ML (2006) Weight management in transitional economies: the “double burden of disease” dilemma. *Asia Pac J Clin Nutr* 15 Suppl: 21–29.
- Popkin BM (1994) The nutrition transition in low-income countries: an emerging crisis. *Nutr Rev* 52: 285–298.
- World Health Organization/FAO (2002) Report of the Joint WHO/FAO Expert Consultation on Diet, Nutrition and the Prevention of Chronic Diseases. Geneva: World Health Organization.
- Monteiro CA, Conde WL, Popkin BM (2002) Is obesity replacing or adding to undernutrition? Evidence from different social classes in Brazil. *Public Health Nutr* 5: 105–112.
- Monteiro CA, Moura EC, Conde WL, Popkin BM (2004) Socioeconomic status and obesity in adult populations of developing countries: a review. *Bull World Health Organ* 82: 940–946.
- Reddy KS, Yusuf S (1998) Emerging epidemic of cardiovascular disease in developing countries. *Circulation* 97: 596–601.
- Popkin BM (2003) The nutrition transition in the developing world. *Development Policy Review* 21: 581–597.
- Yusuf S, Reddy S, Ounpuu S, Anand S (2001) Global burden of cardiovascular diseases: part I: general considerations, the epidemiologic transition, risk factors, and impact of urbanization. *Circulation* 104: 2746–2753.
- Monteiro CA, Conde WL, Popkin BM (2004) The burden of disease from undernutrition and overnutrition in countries undergoing rapid nutrition transition: a view from Brazil. *Am J Public Health* 94: 433–434.
- Kennedy G, Nantel G, Shetty P (2006) The double burden of malnutrition: Case studies from six developing countries. Rome: Nutrition Planning, Assessment and Evaluation Service, Food and Agriculture Organization of the United Nations.
- Shafique S, Akhter N, Stallkamp G, de Pee S, Panagides D, et al. (2007) Trends of under- and overweight among rural and urban poor women indicate the double burden of malnutrition in Bangladesh. *Int J Epidemiol* 36: 449–457.
- Wang H, Du S, Zhai F, Popkin BM (2007) Trends in the distribution of body mass index among Chinese adults, aged 20–45 years (1989–2000). *Int J Obes (Lond)* 31: 272–278.
- Shukla HC, Gupta PC, Mehta HC, Hebert JR (2002) Descriptive epidemiology of body mass index of an urban adult population in western India. *J Epidemiol Community Health* 56: 876–880.
- Griffiths PL, Bentley ME (2001) The nutrition transition is underway in India. *J Nutr* 131: 2692–2700.
- Usfar AA, Lebenthal E, Atmarita, Achadi E, Soekirman, et al. (2010) Obesity as a poverty-related emerging nutrition problems: the case of Indonesia. *Obes Rev* 11: 924–928.
- Ha do T, Feskens EJ, Deurenberg P, Mai le B, Khan NC, et al. (2011) Nationwide shifts in the double burden of overweight and underweight in Vietnamese adults in 2000 and 2005: two national nutrition surveys. *BMC Public Health* 11: 62.
- van der Sande MA, Ceesay SM, Milligan PJ, Nyan OA, Banya WA, et al. (2001) Obesity and undernutrition and cardiovascular risk factors in rural and urban Gambian communities. *Am J Public Health* 91: 1641–1644.
- Steyn K, Bourne L, Jooste P, Fourie JM, Rossouw K, et al. (1998) Anthropometric profile of a black population of the Cape Peninsula in South Africa. *East Afr Med J* 75: 35–40.
- Subramanian SV, Jones K, Duncan C (2003) Multilevel methods for public health research. In: Kawachi I, Berkman LF, eds. *Neighborhoods and health*. New York: Oxford University Press. pp 65–111.
- MEASURE DHS (2009) Demographic and Health Surveys. CalvertonMD: MEASURE DHS.
- Rutstein SO, Rojas G (2003) Guide to DHS Statistics. Calverton, Maryland: ORC Macro, MEASURE DHS+.
- Wirth ME, Wirth E, Delamonica E, Sacks D, Balk A, et al. (2006) Monitoring health equity in the MDGs: A practical guide. New York: CIESIN/UNICEF.
- Vaessen M (1996) The potential of the demographic and health surveys (DHS) for the evaluation and monitoring of maternal and child health indicators. In: Khlata M, ed. *Demographic evaluation of health programmes (Proceedings)*. Paris: CICRED/UNFPA.
- Pullum TW (2008) An Assessment of the Quality of Data on Health and Nutrition in the DHS Surveys, 1993–2003. CalvertonMaryland, , USA: Macro International Inc.
- Macro International Incorporated (1996) Sampling Manual. Calverton, Maryland: DHS-III Basic Documentation No. 6.
- ORC Macro (2006) Demographic and Health Survey Interviewer’s Manual. Calverton, Maryland: MEASURE DHS Basic Documentation No. 2.
- World Health Organization (WHO) Expert Consultation (2004) Appropriate body-mass index for Asian populations and its implications for policy and intervention strategies. *Lancet* 363: 157–163.
- Filmer D, Pritchett LH (2001) Estimating wealth effects without expenditure data—or tears: an application to educational enrollments in states of India. *Demography* 38: 115–132.

## Supporting Information

**Table S1 Year, sampling plan, and response rates for demographic and health (DHS) surveys conducted in 57 low- and middle-income countries.**

(DOC)

**Table S2 Within country (neighborhood-level) correlation and significance level of coexistence of underweight and overweight among women aged 20–49 in 57 low- to middle-income countries, by overall, urban, rural, and low-socioeconomic status samples.**

(DOC)

**Table S3 Global (country and neighborhood-level) and within-country (neighborhood) age-adjusted correlation of underweight and overweight among women aged 20–49 from 36 low- to middle-income countries with repeated surveys.**

(DOC)

## Acknowledgments

The authors acknowledge the support of Macro International Inc. (Washington, DC) for providing access to the various Demographic and Health Surveys.

## Author Contributions

Conceived and designed the experiments: SVS DC JF. Performed the experiments: DC JF SVS. Analyzed the data: DC JF SVS. Contributed reagents/materials/analysis tools: SVS DC JF. Wrote the paper: SVS DC JF.

30. Gwatkin DR, Rustein S, Johnson K, Pande RP, Wagstaff A (2000) Socioeconomic differences in health, nutrition, and population in India. Washington DC: World Bank.
31. Rutstein SO, Johnson K (2004) The DHS wealth asset index. Calverton, Maryland: ORC Macro. no. 6.
32. Rutstein SO (2008) The DHS Wealth Index: Approaches for Rural and Urban Areas. Washington DC: Macro International Inc.
33. Goldstein H (2003) Multilevel statistical models. London: Arnold.
34. Subramanian SV (2004) The relevance of multilevel statistical models for identifying causal neighborhood effects. *Social Science and Medicine* 58: 1961–1967.
35. Browne WJ (2009) MCMC estimation in MLwiN. Bristol, UK: Centre for Multilevel Modelling, University of Bristol.
36. Rasbash J, Steele F, Browne WJ, Goldstein H (2009) A User's Guide to MLwiN, v2.10. Bristol, UK: Centre for Multilevel Modelling, University of Bristol.
37. Griffiths P, Bentley M (2005) Women of higher socio-economic status are more likely to be overweight in Karnataka, India. *Eur J Clin Nutr* 59: 1217–1220.
38. Mendez MA, Monteiro CA, Popkin BM (2005) Overweight exceeds underweight among women in most developing countries. *Am J Clin Nutr* 81: 714–721.
39. Subramanian SV, Perkins JM, Khan KT (2009) Do burdens of underweight and overweight coexist among lower socioeconomic groups in India? *Am J Clin Nutr* 90: 369–376.
40. Subramanian SV, Perkins JM, Ozaltin E, Davey Smith G (2011) Weight of nations: a socioeconomic analysis of women in low- to middle-income countries. *Am J Clin Nutr* 93: 413–421.
41. Doak CM, Adair LS, Bentley M, Monteiro C, Popkin BM (2005) The dual burden household and the nutrition transition paradox. *Int J Obes (Lond)* 29: 129–136.
42. Garrett JL, Ruel MT (2005) Stunted child-overweight mother pairs: prevalence and association with economic development and urbanization. *Food Nutr Bull* 26: 209–221.
43. Ackerson LK, Kawachi I, Barbeau EM, Subramanian SV (2008) Geography of underweight and overweight among women in India: a multilevel analysis of 3204 neighborhoods in 26 states. *Econ Hum Biol* 6: 264–280.
44. Corsi DJ, Kyu HH, Subramanian SV (2011) Socioeconomic and geographic patterning of under- and overnutrition among women in Bangladesh. *J Nutr* 141: 631–638.
45. Subramanian SV, Davey Smith G (2006) Patterns, distribution, and determinants of under- and overnutrition: a population-based study of women in India. *Am J Clin Nutr* 84: 633–640.
46. World Bank (2009) World Development Indicators. Washington, DC: The World Bank.
47. Subramanian SV, Kawachi I, Smith GD (2007) Income inequality and the double burden of under- and overnutrition in India. *J Epidemiol Community Health* 61: 802–809.
